# Supplementary material for: Highly sensitive conjugated polymer fluorescent sensors based on benzochalcogendiazole for nickel ions in real-time detection
Source: Royal Society of Chemistry journal article supplement (doi:10.1039/c4tc01112k), 2014-01-01
Supplement: c4tc01112k1.pdf [file c4tc01112k1.pdf]

## Electronic Supporting Information

### Highly sensitive conjugated polymer fluorescent sensors based on benzochalcogendiazole for nickel ions in real-time detection

Yunxiang Lei, Hui Li, Wenxia Gao, Miaochang Liu, Jiuxi Chen, Jinchang Ding,  
Xiaobo Huang\* and Huayue Wu\*

College of Chemistry and Materials Engineering, Wenzhou University, Wenzhou 325035, China

\*Corresponding authors. Tel.: +86 577 88368280; fax: +86 577 88368280

E-mail addresses: xiaobuang@wzu.edu.cn (X. Huang); huayuewu@wzu.edu.cn (H. Wu)

#### Contents:

1. UV-vis absorption responsive behaviors of P-1 and P-2 on various metal ions
2. Fluorescence responsive behaviors of P-1 and P-2 on various metal ions
3. NMR spectra of the important compounds and the conjugated polymers P-1 and P-2

#### 1. UV-vis absorption responsive behaviors of P-1 and P-2 on various metal ions

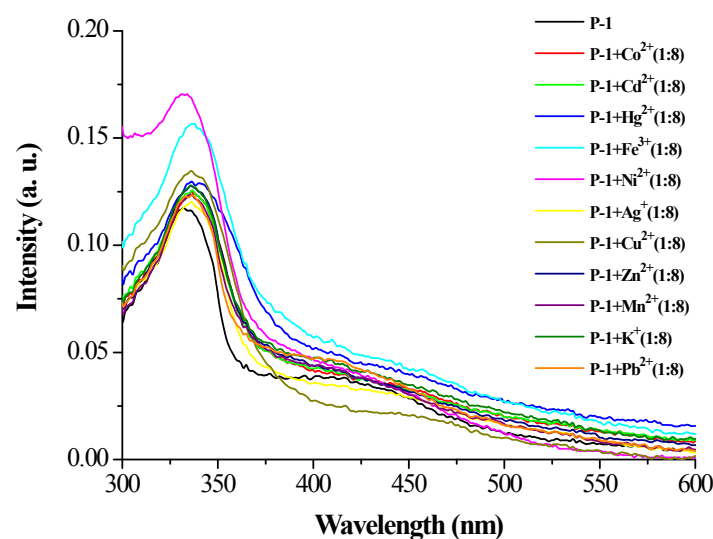

**Fig. S1** UV-vis spectra of **P-1** (10 μmol·L<sup>-1</sup>, CHCl<sub>3</sub>) in the presence of various metal ions (each 80 μmol·L<sup>-1</sup>, CH<sub>3</sub>CN)

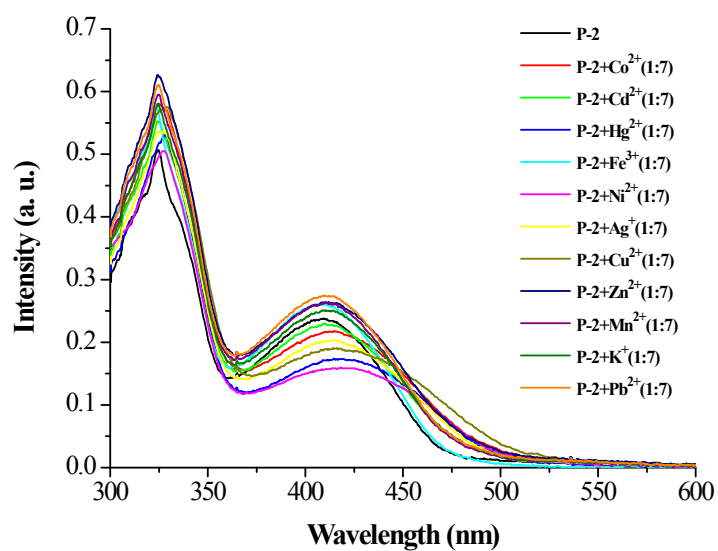

**Fig. S2** UV-vis spectra of **P-2** ( $10 \mu\text{mol}\cdot\text{L}^{-1}$ ,  $\text{CHCl}_3$ ) in the presence of various metal ions (each  $70 \mu\text{mol}\cdot\text{L}^{-1}$ ,  $\text{CH}_3\text{CN}$ )

## 2. Fluorescence responsive behaviors of P-1 and P-2 on various metal ions

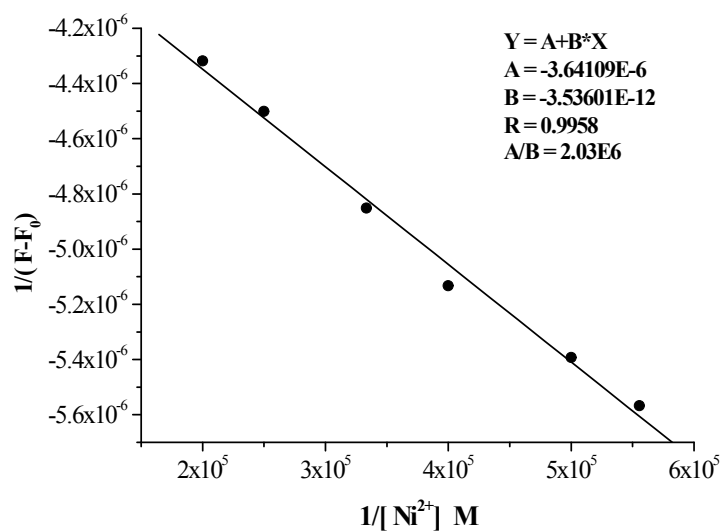

**Fig. S3** Benesi-Hildebrand plot for  $\text{Ni}^{2+}$ -bound **P-1**.

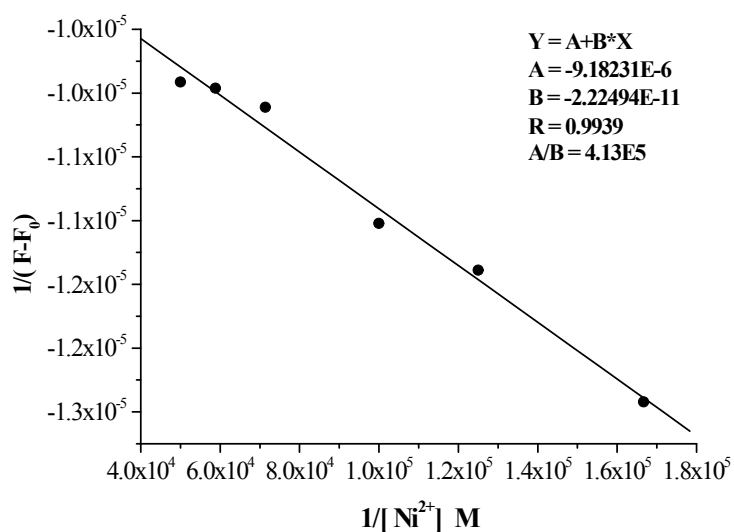

**Fig. S4** Benesi-Hildebrand plot for  $Ni^{2+}$ -bound **P-2**.

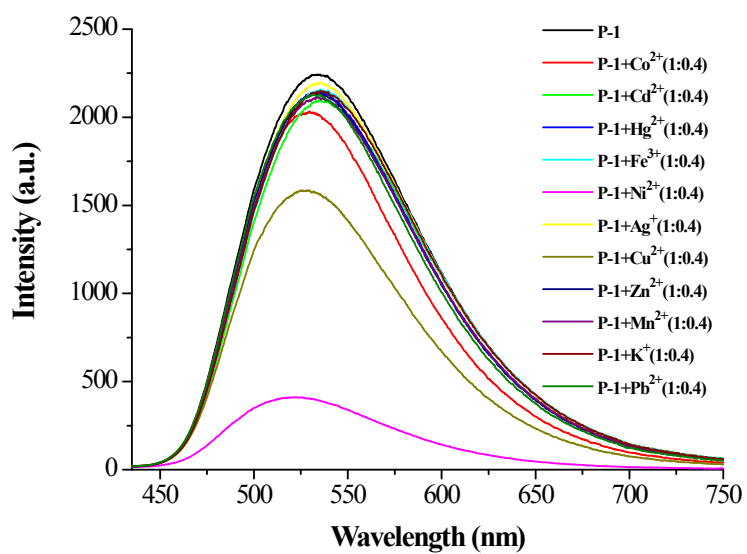

**Fig. S5** Fluorescence spectra of **P-1** ( $10 \mu\text{mol}\cdot\text{L}^{-1}$ ) in  $\text{CHCl}_3$  in the presence of in the presence of various metal ions in  $\text{CH}_3\text{CN}$  (each  $4 \mu\text{mol}\cdot\text{L}^{-1}$ ).

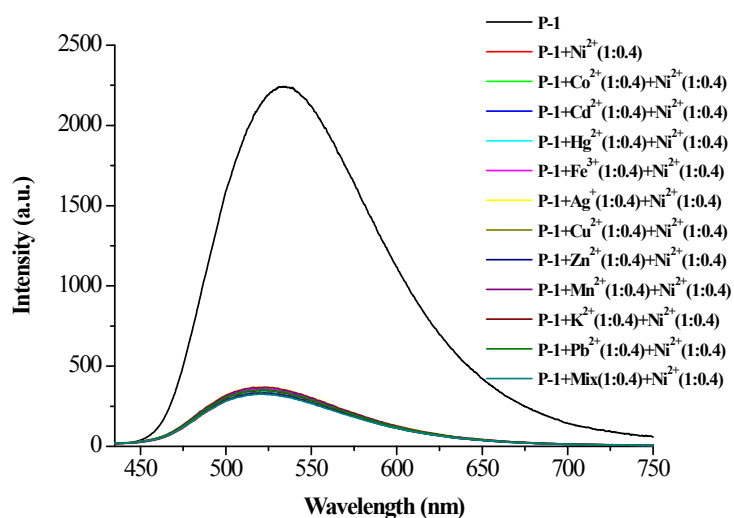

**Fig. S6** Metal specificity: the concentration of P-1 is ( $10 \mu\text{mol}\cdot\text{L}^{-1}$ ), the concentration of Ni<sup>2+</sup> is  $4 \mu\text{mol}\cdot\text{L}^{-1}$  and the other metal ions are used at  $4 \mu\text{mol}\cdot\text{L}^{-1}$ . Mix: the mixture of Co<sup>2+</sup>, Cd<sup>2+</sup>, Hg<sup>2+</sup>, Fe<sup>3+</sup>, Ag<sup>+</sup>, Cu<sup>2+</sup>, Zn<sup>2+</sup>, Mn<sup>2+</sup>, K<sup>+</sup> and Pb<sup>2+</sup>.

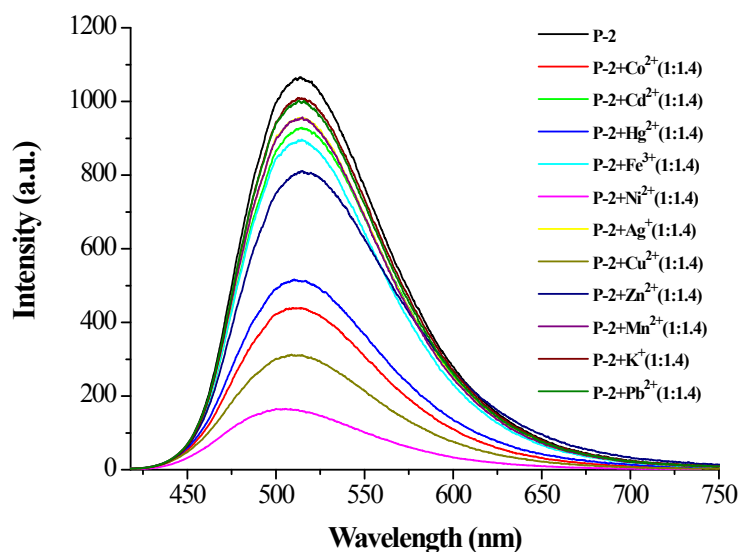

**Fig. S7** Fluorescence spectra of P-2 ( $10 \mu\text{mol}\cdot\text{L}^{-1}$ ) in CHCl<sub>3</sub> in the presence of in the presence of various metal ions in CH<sub>3</sub>CN (each  $14 \mu\text{mol}\cdot\text{L}^{-1}$ ).

### 3. NMR spectra of the important compounds and the conjugated polymers P-1 and P-2

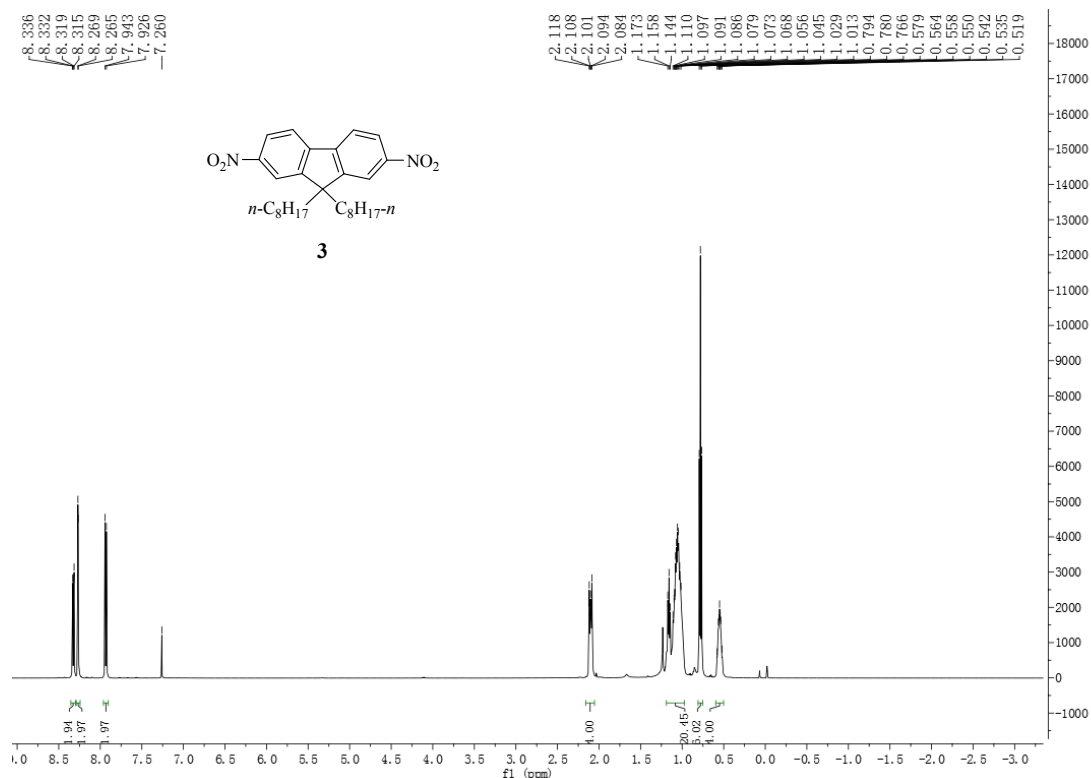

**Fig. S8** <sup>1</sup>H NMR of compound **3** (CDCl<sub>3</sub>, 500 MHz)

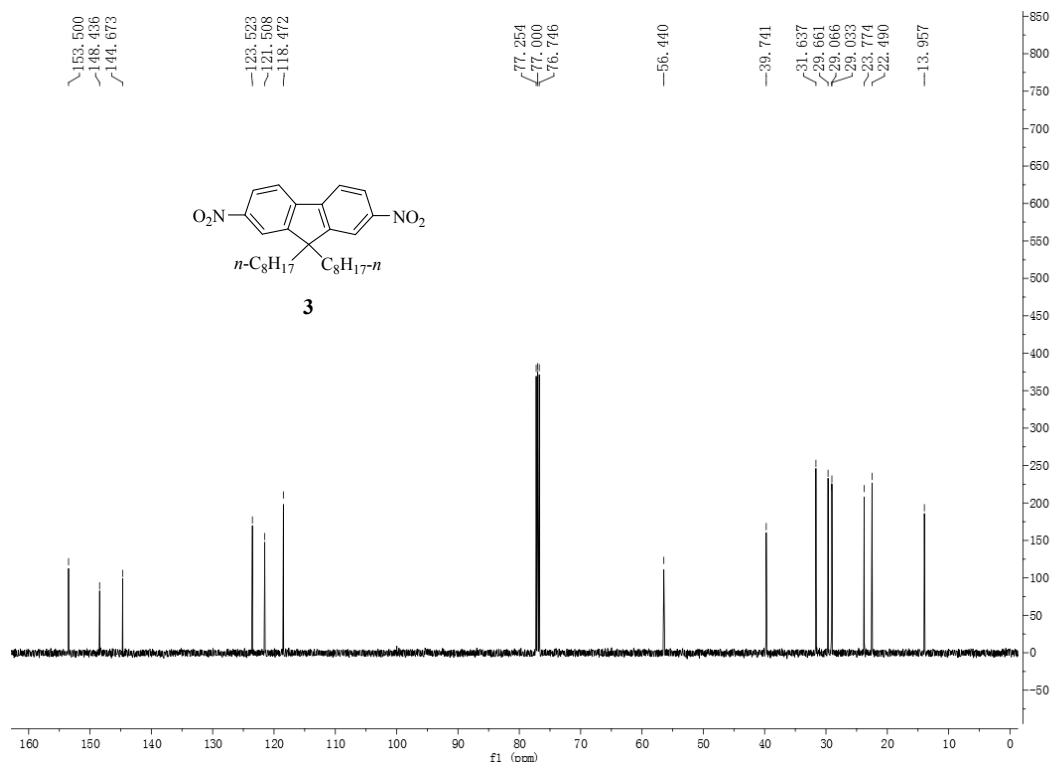

**Fig. S9** <sup>13</sup>C NMR of compound **3** (CDCl<sub>3</sub>, 125 MHz)

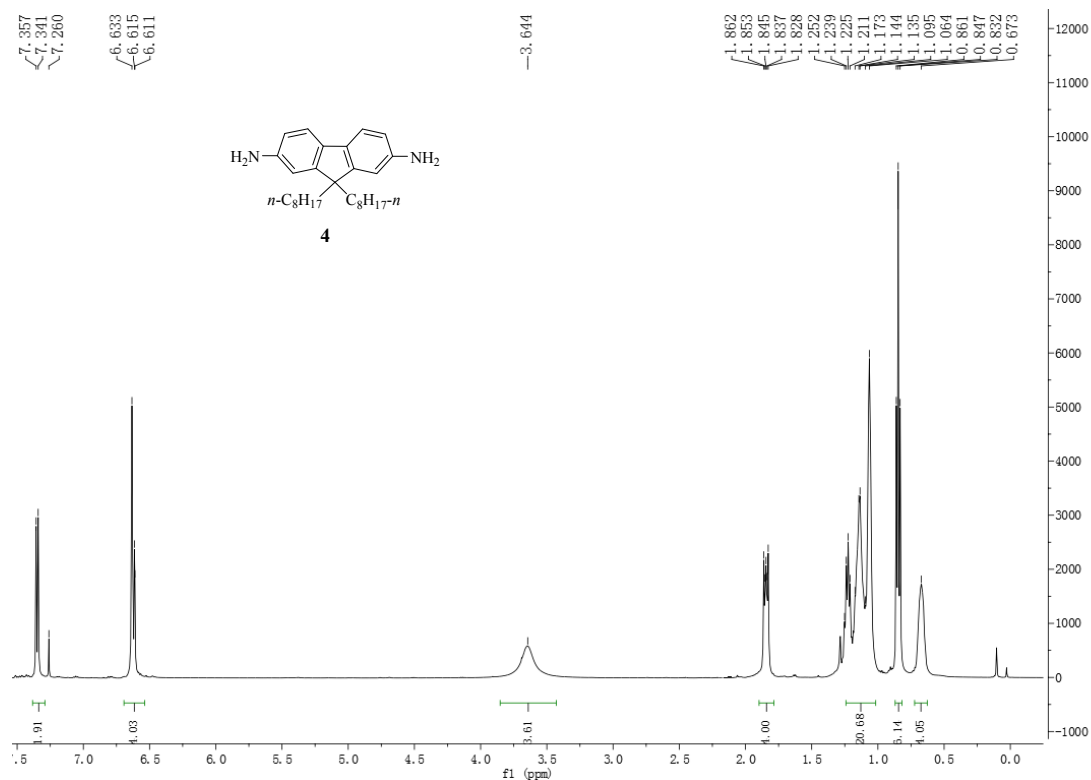

**Fig. S10** <sup>1</sup>H NMR of compound **4** (CDCl<sub>3</sub>, 500 MHz)

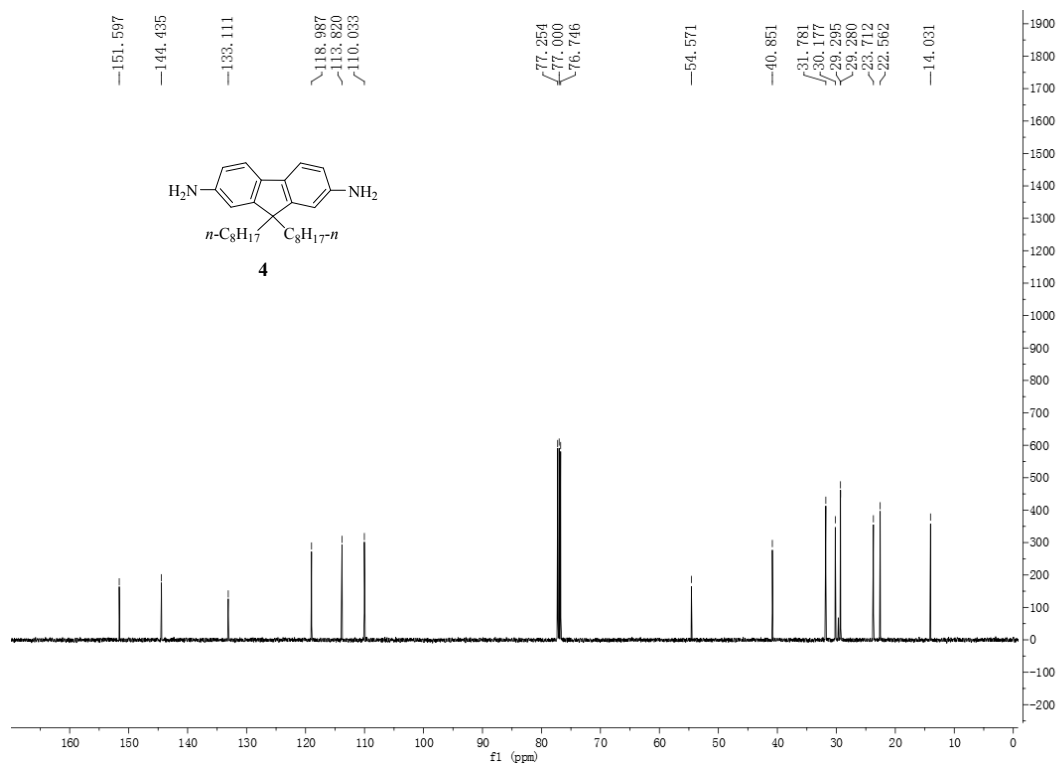

**Fig. S11** <sup>13</sup>C NMR of compound **4** (CDCl<sub>3</sub>, 125 MHz)

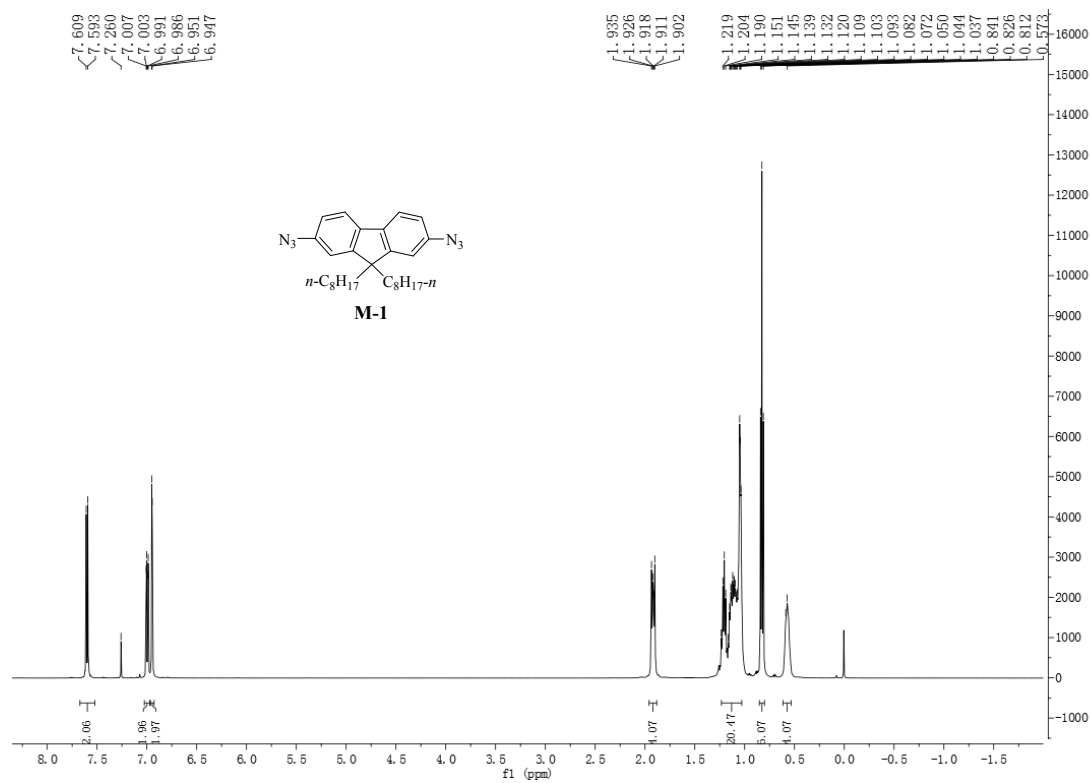

**Fig. S12**  $^1\text{H}$  NMR of compound **M-1** ( $\text{CDCl}_3$ , 500 MHz)

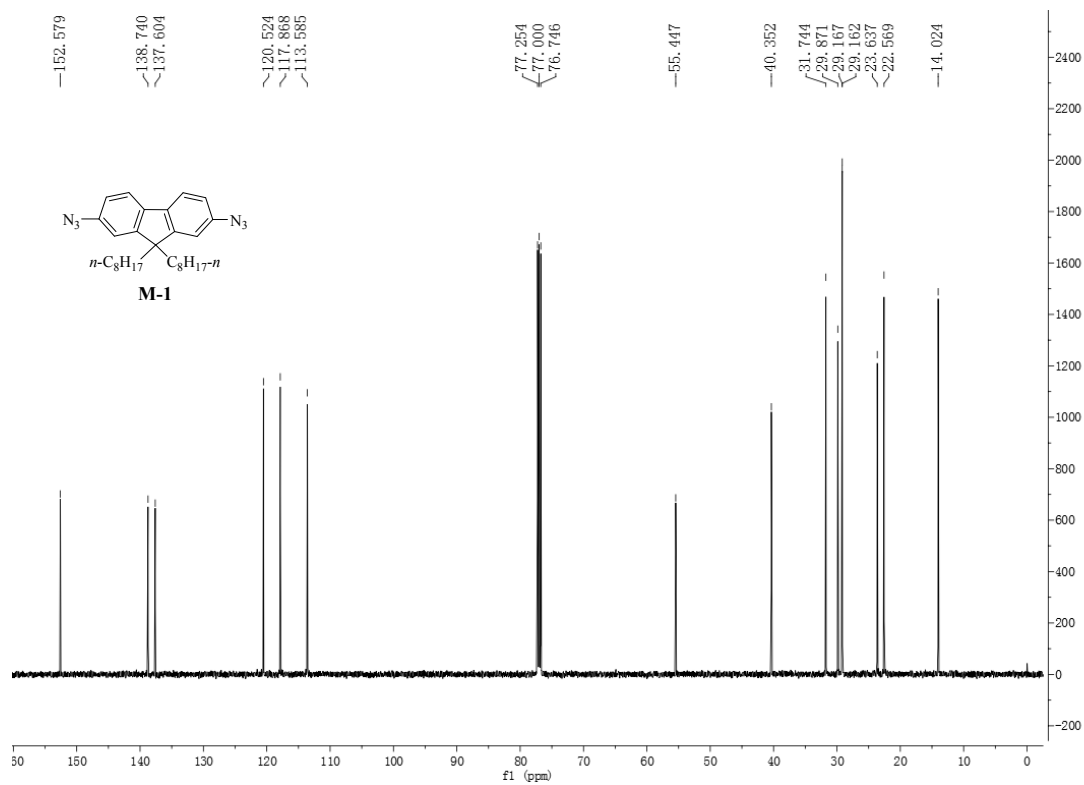

**Fig. S13**  $^{13}\text{C}$  NMR of **M-1** ( $\text{CDCl}_3$ , 125 MHz)

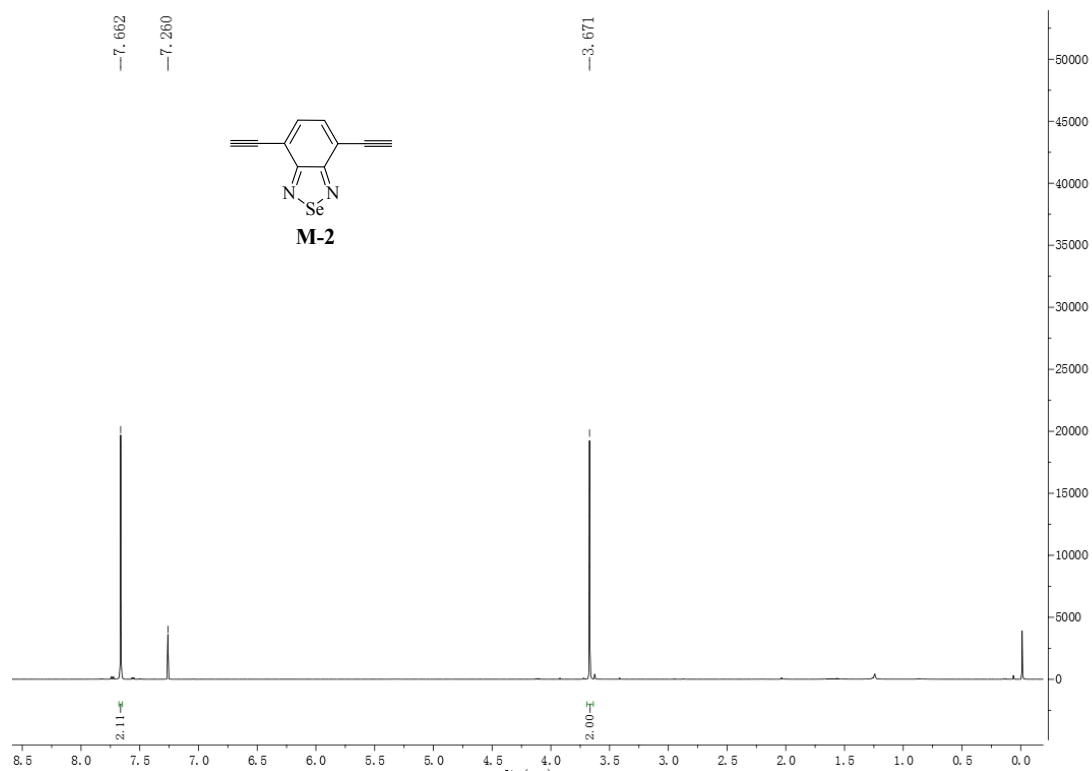

Fig. S14  $^1\text{H}$  NMR of **M-2** ( $\text{CDCl}_3$ , 500 MHz)

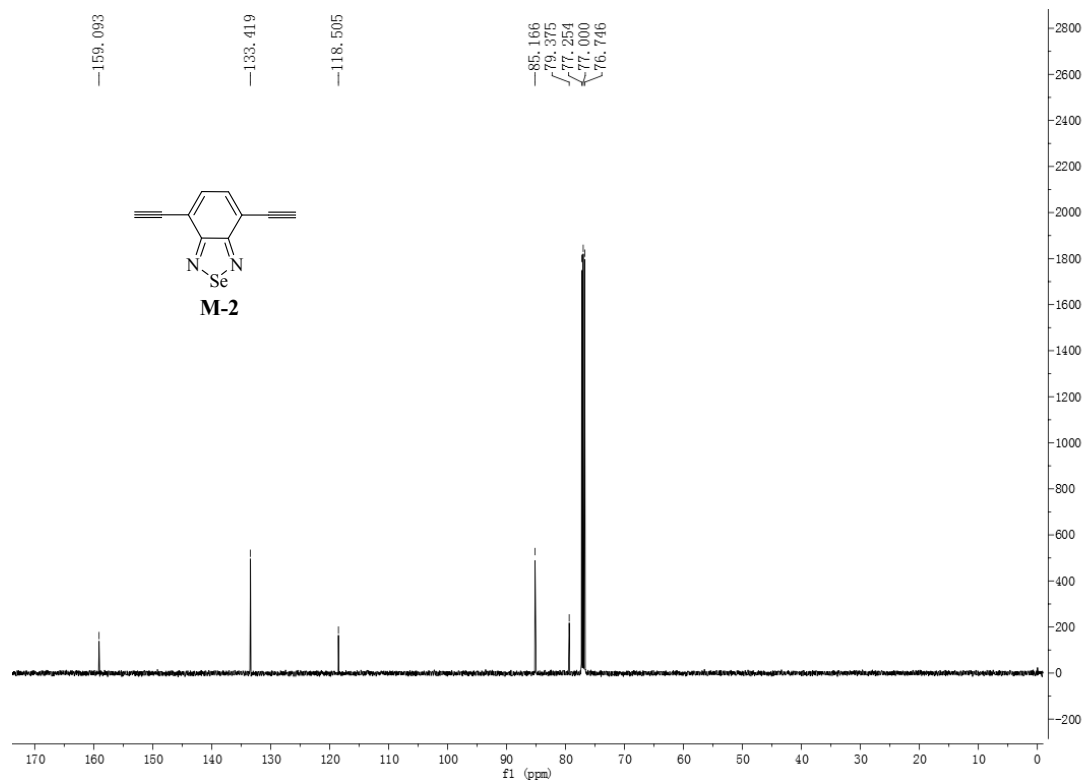

Fig. S15  $^{13}\text{C}$  NMR of **M-2** ( $\text{CDCl}_3$ , 125 MHz)



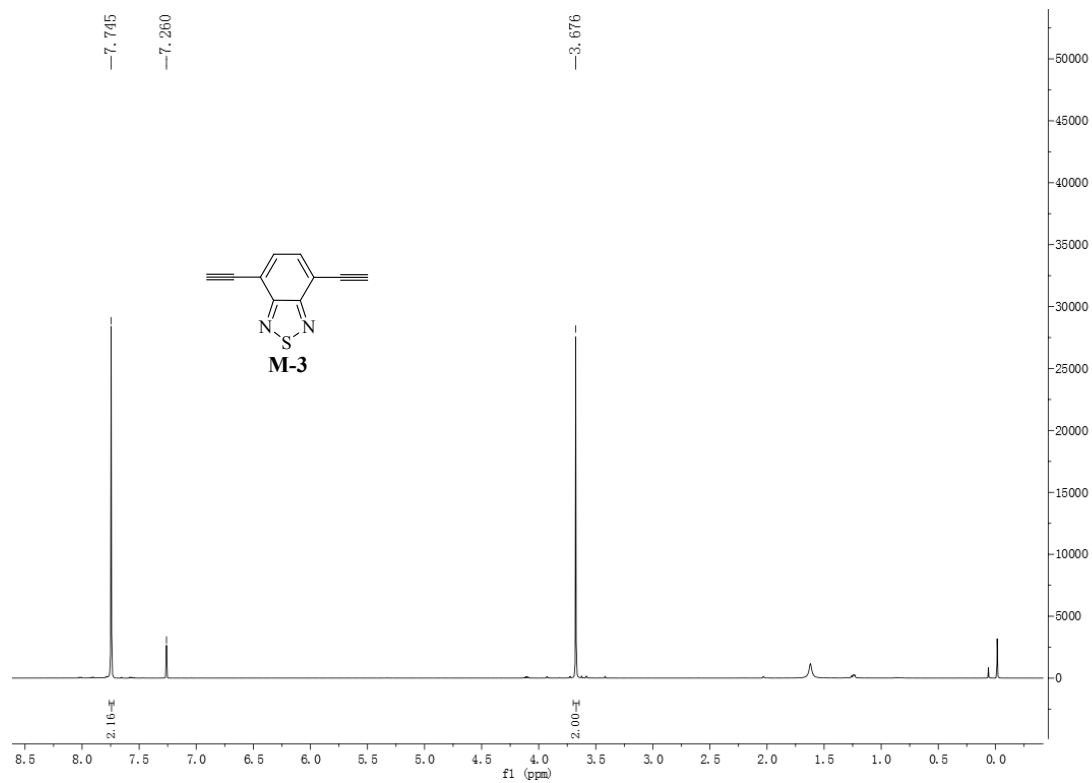

Fig. S16  $^1\text{H}$  NMR of M-3 ( $\text{CDCl}_3$ , 500 MHz)

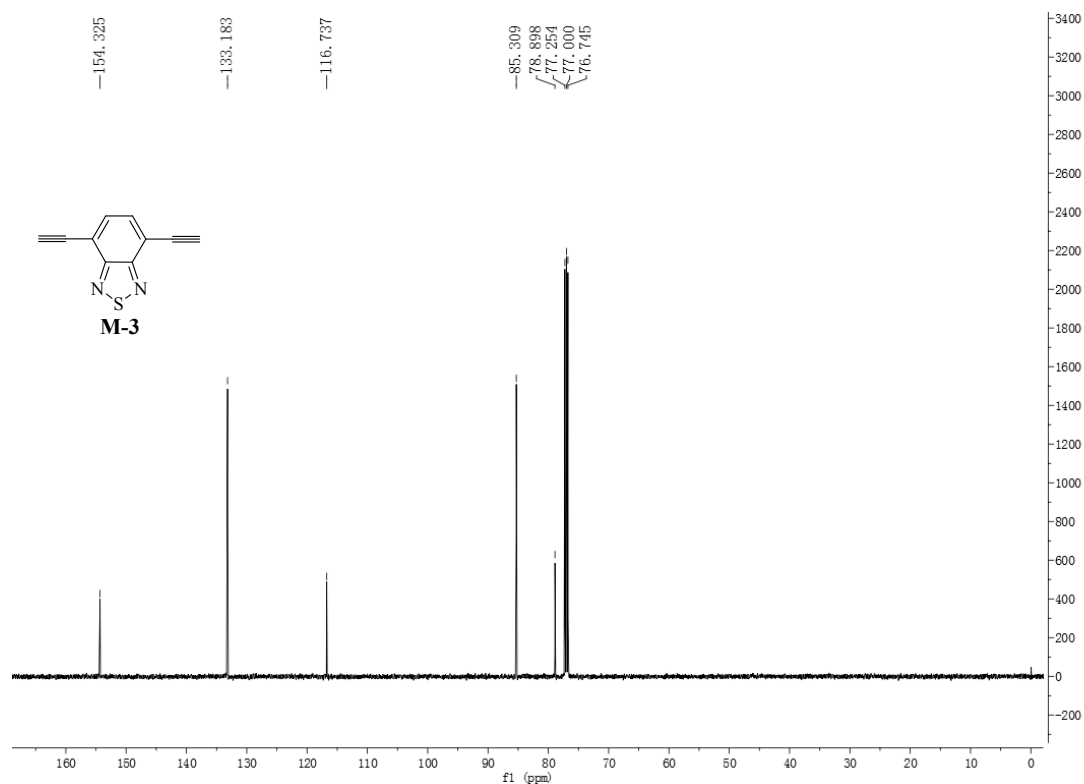

Fig. S17  $^{13}\text{C}$  NMR of M-3 ( $\text{CDCl}_3$ , 125 MHz)

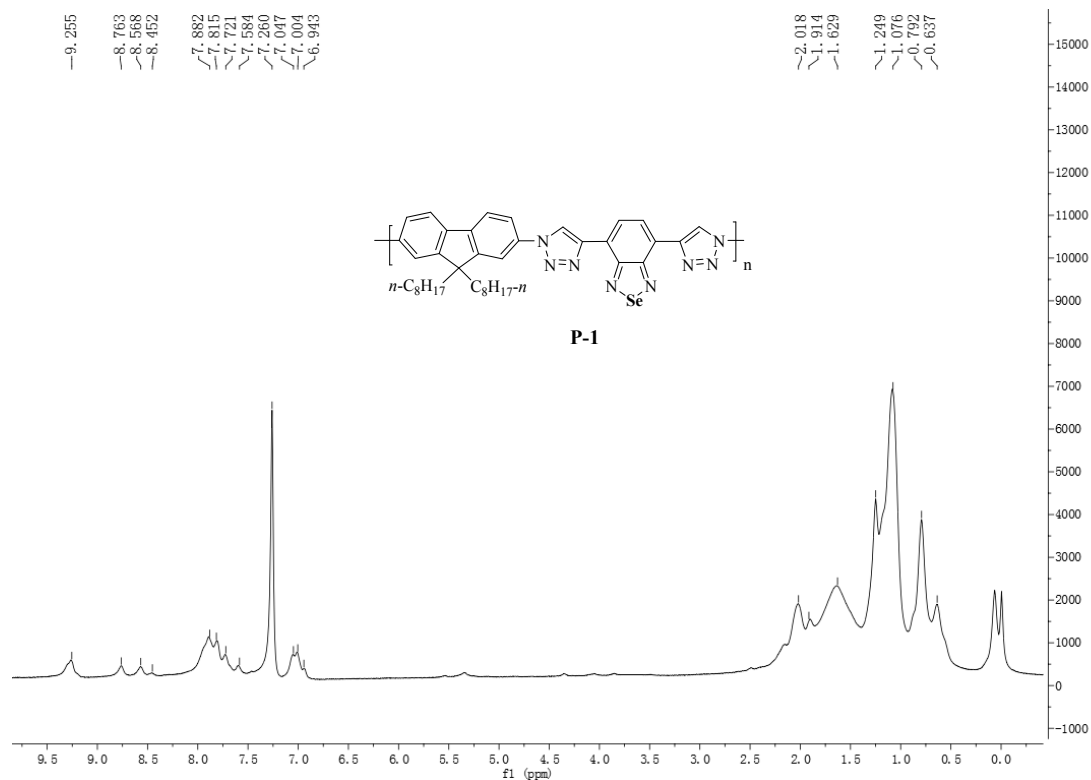

**Fig. S18**  $^1\text{H}$  NMR of P-1 ( $\text{CDCl}_3$ , 500 MHz)

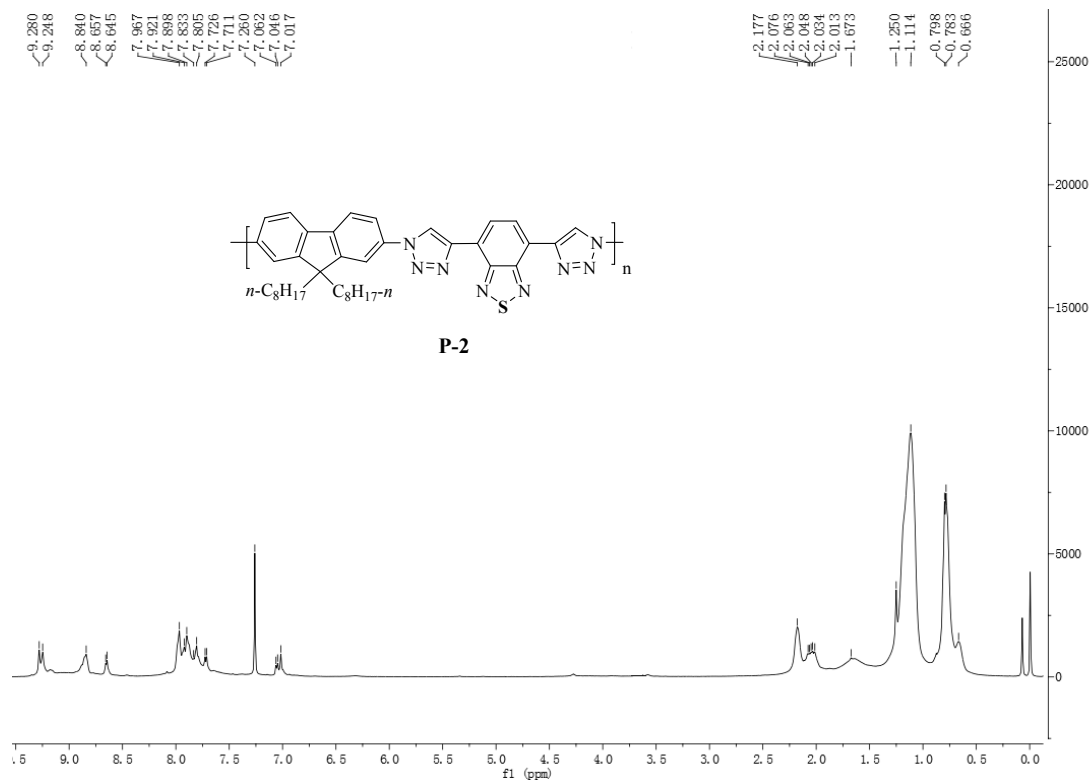

**Fig. S19**  $^1\text{H}$  NMR of P-2 ( $\text{CDCl}_3$ , 500 MHz)
